# Supplementary material for: Exploring relationships between whole carcass condemnation abattoir data, non-disease factors and disease outbreaks in swine herds in Ontario (2001–2007)
Source: Springer Nature journal article supplement (doi:10.1186/1756-0500-7-185), 2014-03-28

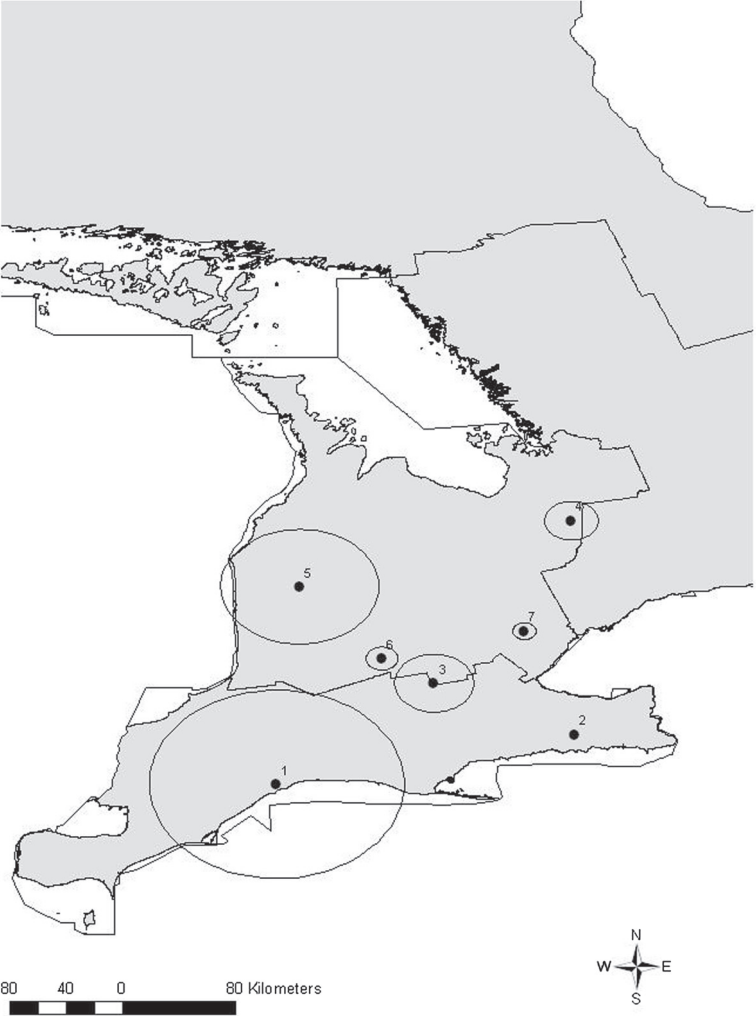

Supplement: 13104_2013_2718_MOESM4_ESM.pdf [file 13104_2013_2718_MOESM4_ESM.pdf]
